# Supplementary material for: TUBA4A downregulation as observed in ALS post-mortem motor cortex causes ALS-related abnormalities in zebrafish
Source: Frontiers journal article supplement (doi:10.3389/fncel.2024.1340240), 2024-02-21
Supplement: Data_Sheet_1.PDF [file Data_Sheet_1.PDF]

# Supplementary Material:

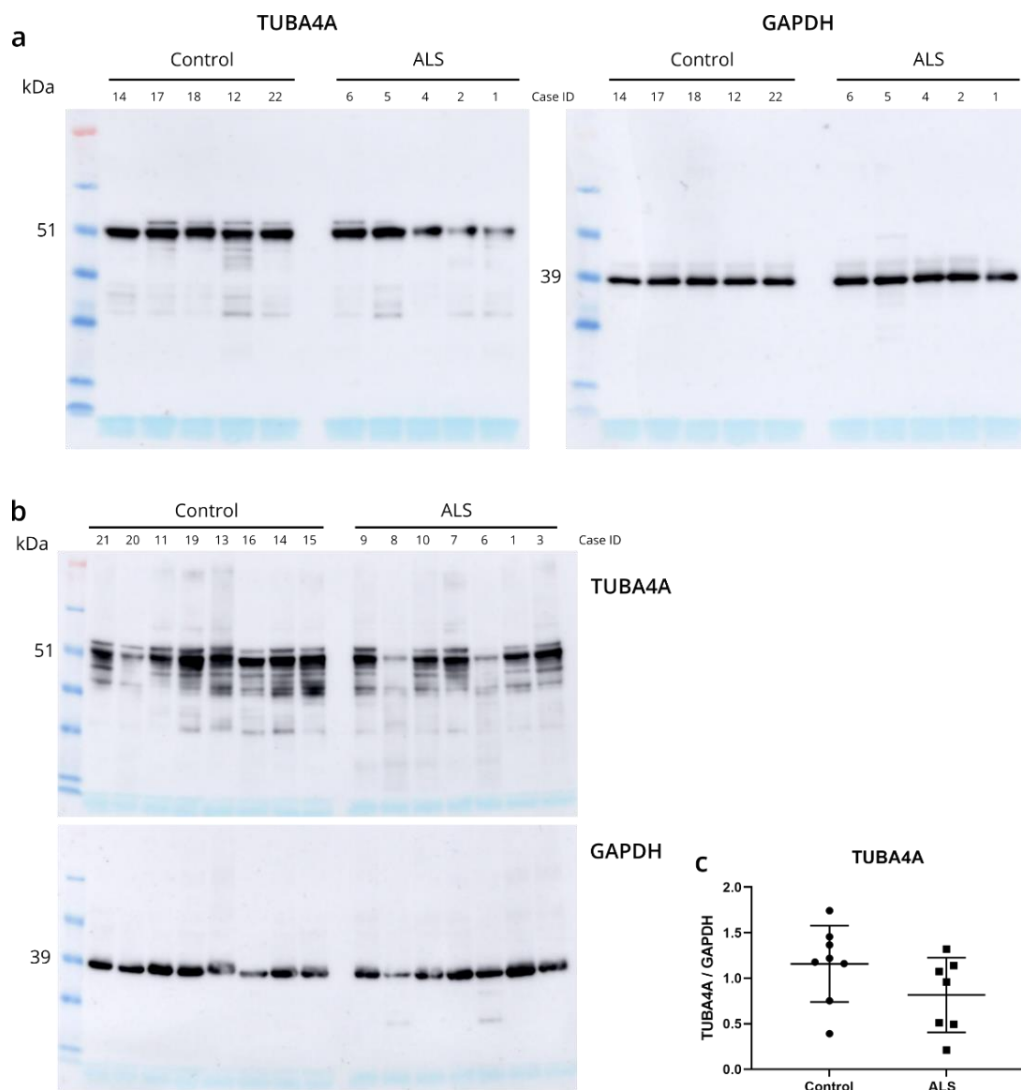

**Supplementary Figure 1. ALS post-mortem motor cortex and spinal cord full western blots for TUBA4A.** (a,b) Full western blots using antibodies against TUBA4A and GAPDH on SDS-soluble lysates extracted from the motor cortex (a) and spinal cord (b) of control (n = 5 and n = 8 resp.) and ALS (n = 5 and n = 7 resp.) cases. (c) Quantification of the expression of TUBA4A as a ratio to GAPDH in the spinal cord.  $p = 0.1349$ ; unpaired t-test.

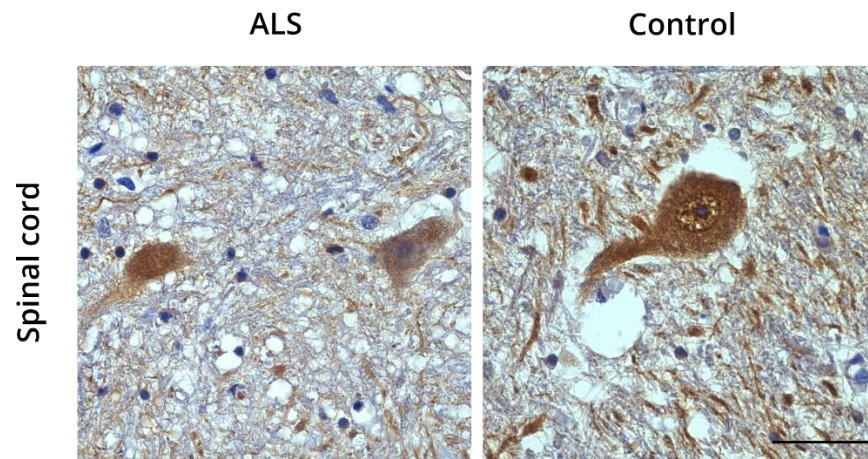

**Supplementary Figure 2. Immunohistochemical analysis of TUBA4A in ALS and control *post-mortem* cases.** Immunohistochemical stainings of spinal cord of representative ALS and control cases with an antibody against TUBA4A. Scale bar represents 50  $\mu\text{m}$ .

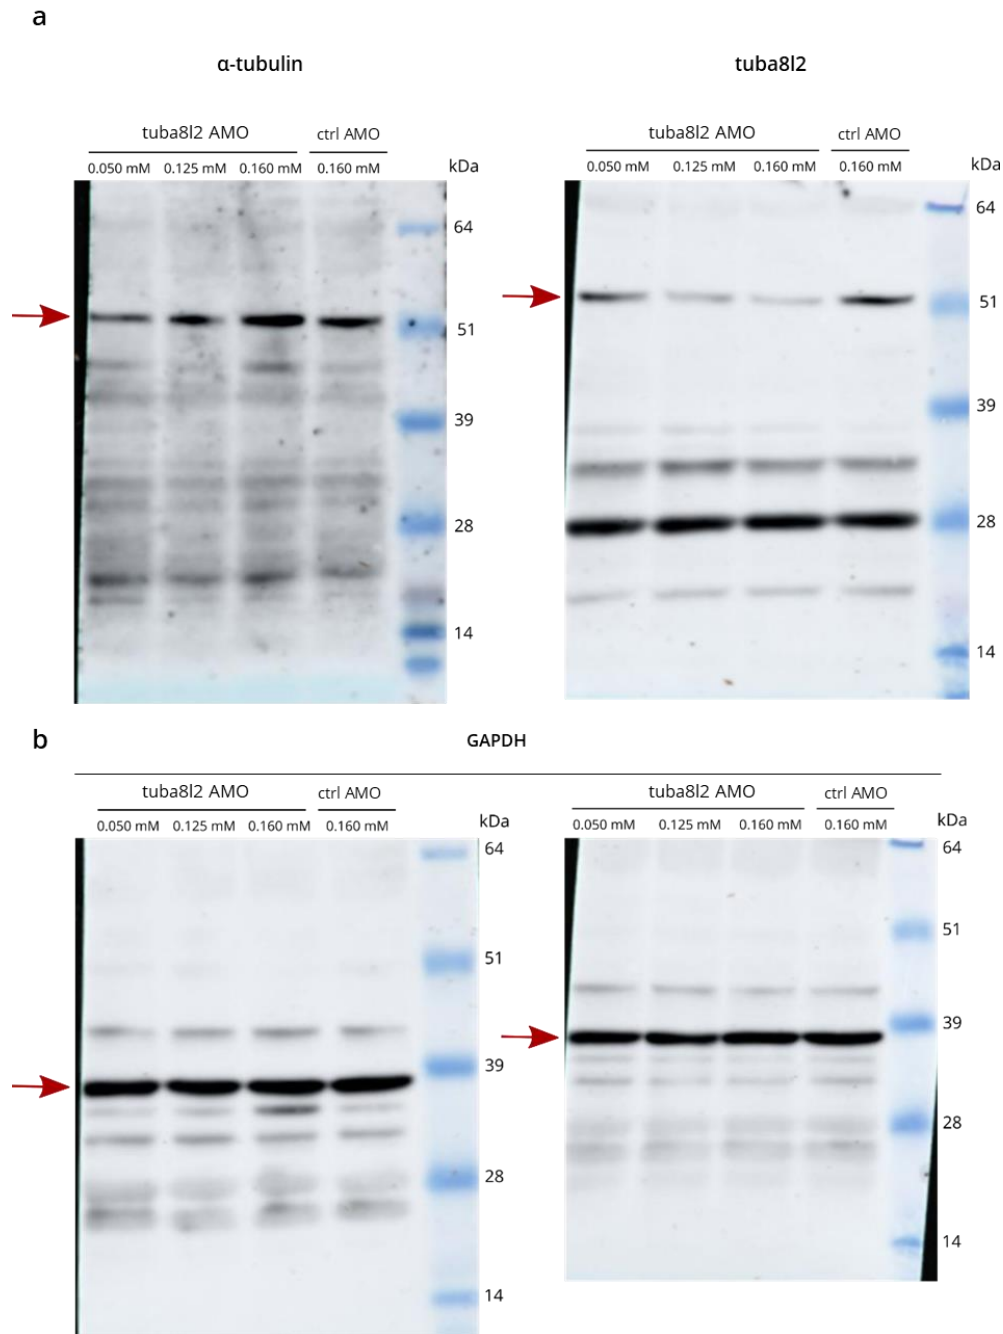

**Supplementary Figure 3. Full western blots showing the specific tuba8l2 knockdown in zebrafish.** Western blot was performed at 48 hpf after injection of different doses of ATG morpholino against tuba8l2 (0.160 mM, 0.125 mM and 0.050 mM) as well as the injection of a control morpholino (0.160 mM). **(a)** Arrow indicates the correct band for  $\alpha$ -tubulin and tuba8l2. **(b)** Arrow indicates the correct band at 37 kDa for the corresponding GAPDH loading control.

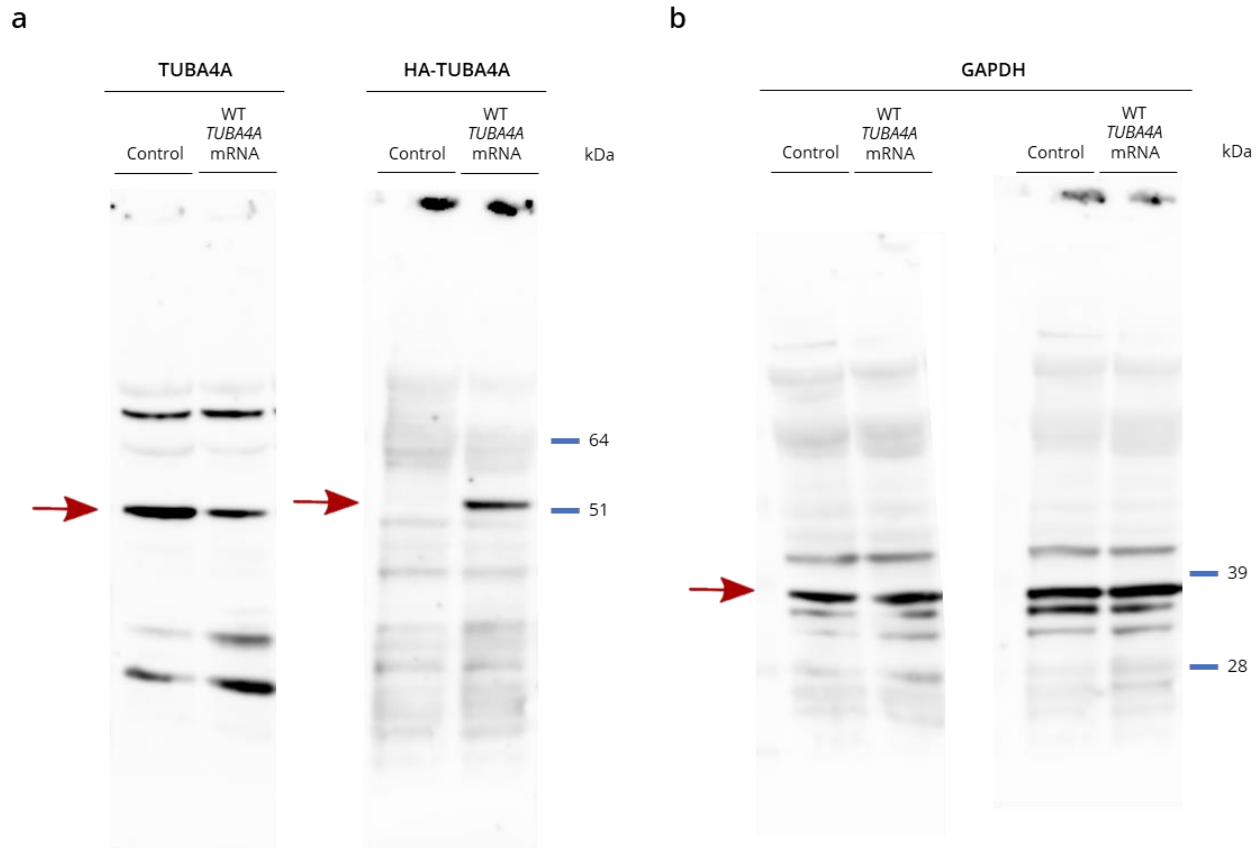

**Supplementary Figure 4. Confirmation of expression of HA-tagged wild-type TUBA4A protein after micro-injection of mRNA in zebrafish.** Western blot performed at 48 hpf after injection of HA-tagged wild-type *TUBA4A* mRNA shows **(a)** a down regulation of endogenous TUBA4A expression (left) with the expression of an HA-TUBA4A protein product using an antibody against HA (cat no. 3724, Cell Signaling, Danvers, MA, USA, 1:1000) (right). This was absent in the non-injected control condition. Arrow indicates the correct band for TUBA4A (left) and HA-TUBA4A (right). **(b)** Arrow indicates the correct band at 37 kDa for the corresponding GAPDH loading control.

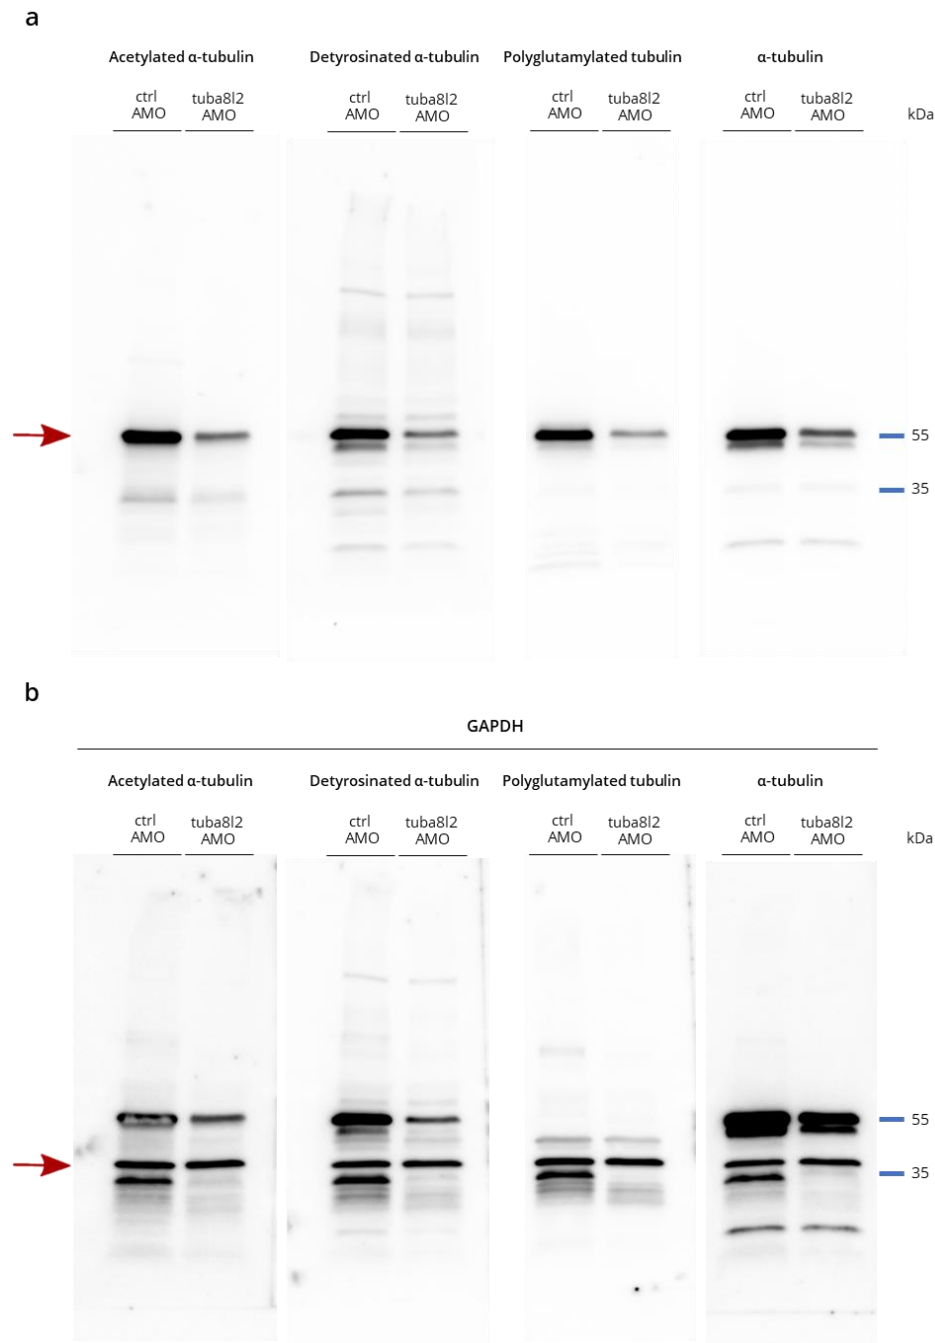

**Supplementary Figure 5. Full western blots showing the post-translational modifications for tuba8l2 knockdown in zebrafish.** Western blot was performed at 48 hpf after injection of ATG morpholino against tuba8l2 (0.160 mM) as well as the injection of a control morpholino (0.160 mM). **(a)** Arrow indicates the correct band for acetylated  $\alpha$ -tubulin, detyrosinated  $\alpha$ -tubulin, polyglutamylated tubulin and  $\alpha$ -tubulin. **(b)** Arrow indicates the correct band at 37 kDa for the corresponding GAPDH loading control.

**Supplementary Table 1. List of human cases used in the study.** The table provides information regarding age (= age at death), sex, diagnosis, A $\beta$ MTL phase, Braak NFT stage, disease duration (months), PMI (hours) and application (1 = western blot motor cortex; 2 = western blot spinal cord; 3 = immunohistochemistry). Abbreviations: f = female; m = male; ALS = amyotrophic lateral sclerosis; control = non-neurodegenerative disease control; A = aneurysm; AGD = argyrophilic grain disease; ARTAG = aging-related tau astroglialopathy; CM = carcinoma metastasis; GB = Guillian-Barre syndrome; I = infarction; MI = microinfarction; n.a. = not applicable; PART = primary age-related tauopathy; SVD = small vessel disease; SVE = subcortical vascular encephalopathy; PMI = *post-mortem* interval.

| Case n° | Age | Sex | Diagnosis                      | A $\beta$ MTL phase | Braak NFT stage | Disease duration | PMI (hours) | Application |
|---------|-----|-----|--------------------------------|---------------------|-----------------|------------------|-------------|-------------|
| 1       | 58  | f   | ALS, PART                      | 0                   | 2               | 18 months        | 24          | (1,2,3)     |
| 2       | 51  | m   | ALS                            | 0                   | 1               | 8 months         | 24          | (1)         |
| 3       | 49  | m   | ALS, PART                      | 0                   | 1               | 45 months        | 24          | (2)         |
| 4       | 46  | m   | ALS                            | 0                   | 1               | 40 months        | 24          | (1)         |
| 5       | 62  | m   | ALS, MI, I, ARTAG, PART, AGD   | 0                   | 1               | 154 months       | 12          | (1)         |
| 6       | 53  | m   | ALS                            | 0                   | 1               | 92 months        | 24          | (1,2,3)     |
| 7       | 74  | m   | ALS                            | 1                   | 1               | 47 months        | 24          | (2)         |
| 8       | 50  | f   | ALS                            | 0                   | 1               | 18 months        | 24          | (2)         |
| 9       | 54  | m   | ALS                            | 0                   | 1               | 88 months        | 6           | (2)         |
| 10      | 68  | m   | ALS, SVD                       | 2                   | 2               | 36 months        | 144         | (2)         |
| 11      | 46  | m   | Control                        | 0                   | 1               | n.a.             | 29          | (2)         |
| 12      | 74  | m   | Control, CM, I, MI             | 0                   | 0               | n.a.             | 72          | (1,3)       |
| 13      | 45  | m   | Control                        | 0                   | 0               | n.a.             | 24          | (2)         |
| 14      | 61  | m   | Control, SVD                   | 0                   | 0               | n.a.             | 48          | (1,2,3)     |
| 15      | 55  | m   | Control, A, I                  | 0                   | 0               | n.a.             | 96          | (2)         |
| 16      | 74  | f   | Control, AGD, SVE              | 0                   | 1               | n.a.             | 24          | (2)         |
| 17      | 35  | m   | Control, Limbic encephalopathy | 0                   | 0               | n.a.             | 72          | (1)         |
| 18      | 54  | m   | Control, GB                    | 0                   | 1               | n.a.             | 24          | (1)         |
| 19      | 63  | f   | Control, MI                    | 0                   | 1               | n.a.             | 96          | (2)         |
| 20      | 64  | m   | Control                        | 0                   | 0               | n.a.             | 96          | (2)         |
| 21      | 35  | m   | Control                        | 0                   | 1               | n.a.             | 48          | (2)         |
| 22      | 64  | m   | Control                        | 0                   | 1               | n.a.             | 24          | (1)         |

**Supplementary Table 2. List of antibodies used in the study.** The table summarizes information about host, clonality, supplier and catalog number of the primary antibodies used for immunohistochemistry (IHC), immunofluorescence (IF) and western blot (WB). Dilutions are given.

| Primary antibody                   | Host   | Clonality  | Supplier     | Catalogue number | Dilution IHC | Dilution IF | Dilution WB |
|------------------------------------|--------|------------|--------------|------------------|--------------|-------------|-------------|
| TUBA4A (C-term)                    | Rabbit | Polyclonal | Abgent       | AP13535b         | 1:100        | -           | 1:8000      |
| alpha-tubulin                      | Mouse  | Monoclonal | Sigma        | T6199            | -            | -           | 1:2000      |
| anti-GAPDH (clone 6C5)             | Mouse  | Monoclonal | ThermoFisher | AM4300           | -            | -           | 1:10 000    |
| anti- $\beta$ -Amyloid (clone 4G8) | Mouse  | Monoclonal | BioLegend    | SIG-39220        | 1:5000       | -           | -           |
| anti-pTDP43 (S409/410-2)           | Rabbit | Polyclonal | Cosmo Bio    | TIP-PTD-P02      | 1:5000       | -           | -           |
| anti-pTau (S202/T205) (clone AT8)  | Mouse  | Monoclonal | ThermoFisher | MN1020           | 1:1000       | -           | -           |
| SV2                                | Mouse  | Monoclonal | DSHB         | AB2315387        | -            | 1:200       | -           |
| Anti-Acetylated tubulin            | Mouse  | Monoclonal | Sigma        | T7451            | -            | -           | 1:5000      |
| Anti-Detyrosinated tubulin         | Rabbit | Polyclonal | Sigma        | AB3201           | -            | -           | 1:500       |
| Anti-polyglutamate (IN105)         | Rabbit | Polyclonal | Adipogen     | AG-25B-0030-C050 | -            | -           | 1:20 000    |
